# Supplementary material for: From Gestational Age–Specific Serum Creatinine Trajectories to an Interactive Clinical Interpretation Tool in Level IV NICU Infants
Source: Research Square preprint supplement (doi:10.21203/rs.3.rs-10296400/v1), 2026-07-16
Supplement: Supplementary file 1 [file bf6488868ed7a3a47e1a3cf9.docx]

| **Table 1. Characteristics of the Study Population by Gestational Age Group** | | | | | | | |
| --- | --- | --- | --- | --- | --- | --- | --- |
| **Characteristic** | **Overall**,  N = 34,306*1* | **22-24**,  N = 1,859*1* | **25-27**,  N = 2,960*1* | **28-30**,  N = 2,498*1* | **31-33**,  N = 3,073*1* | **34-36**,  N = 6,346*1* | **>=37**,  N = 17,570*1* |
| Birth weight, g | 2,661 (1,540-3,290) | 615 (543-697) | 840 (705-970) | 1,220 (1,005-1,430) | 1,770 (1,488-2,070) | 2,490 (2,125-2,875) | 3,220 (2,845-3,600) |
| Gestational age at birth, weeks | 37.0 (32.1-39.0) | 24.0 (23.4-24.4) | 26.3 (25.6-27.0) | 29.3 (28.6-30.1) | 32.4 (31.9-33.3) | 35.7 (34.9-36.3) | 39.0 (38.0-39.7) |
| Sex |  |  |  |  |  |  |  |
| Female | 14,704 (42.9%) | 885 (47.6%) | 1,306 (44.1%) | 1,070 (42.8%) | 1,356 (44.1%) | 2,688 (42.4%) | 7,399 (42.1%) |
| Male | 19,572 (57.1%) | 972 (52.3%) | 1,653 (55.8%) | 1,426 (57.1%) | 1,712 (55.7%) | 3,656 (57.6%) | 10,153 (57.8%) |
| Other/  Indeterminate | 28 (0.1%) | 2 (0.1%) | 0 (0.0%) | 1 (0.0%) | 5 (0.2%) | 2 (0.0%) | 18 (0.1%) |
| Unknown/  Missing | 2 (0.0%) | 0 (0.0%) | 1 (0.0%) | 1 (0.0%) | 0 (0.0%) | 0 (0.0%) | 0 (0.0%) |
| Hispanic ethnicity |  |  |  |  |  |  |  |
| No | 28,817 (84.0%) | 1,611 (86.7%) | 2,528 (85.4%) | 2,153 (86.2%) | 2,658 (86.5%) | 5,333 (84.0%) | 14,534 (82.7%) |
| Unknown/  Missing | 1,903 (5.5%) | 80 (4.3%) | 130 (4.4%) | 109 (4.4%) | 129 (4.2%) | 356 (5.6%) | 1,099 (6.3%) |
| Yes | 3,586 (10.5%) | 168 (9.0%) | 302 (10.2%) | 236 (9.4%) | 286 (9.3%) | 657 (10.4%) | 1,937 (11.0%) |
| Maternal race |  |  |  |  |  |  |  |
| American Indian or Alaska Native | 105 (0.3%) | 1 (0.1%) | 6 (0.2%) | 14 (0.6%) | 17 (0.6%) | 30 (0.5%) | 37 (0.2%) |
| Asian | 1,112 (3.2%) | 61 (3.3%) | 76 (2.6%) | 55 (2.2%) | 81 (2.6%) | 175 (2.8%) | 664 (3.8%) |
| Black | 8,917 (26.0%) | 857 (46.1%) | 1,157 (39.1%) | 819 (32.8%) | 885 (28.8%) | 1,345 (21.2%) | 3,854 (21.9%) |
| Native Hawaiian or Pacific Islander | 50 (0.1%) | 5 (0.3%) | 3 (0.1%) | 0 (0.0%) | 7 (0.2%) | 10 (0.2%) | 25 (0.1%) |
| Other | 2,762 (8.1%) | 120 (6.5%) | 213 (7.2%) | 177 (7.1%) | 215 (7.0%) | 493 (7.8%) | 1,544 (8.8%) |
| Unknown/  Missing | 1,902 (5.5%) | 84 (4.5%) | 123 (4.2%) | 121 (4.8%) | 123 (4.0%) | 337 (5.3%) | 1,114 (6.3%) |
| White | 19,458 (56.7%) | 731 (39.3%) | 1,382 (46.7%) | 1,312 (52.5%) | 1,745 (56.8%) | 3,956 (62.3%) | 10,332 (58.8%) |
| *1* Median (25%-75%); n (%) | | | | | | | |
| Values are median (interquartile range) or n (%). | | | | | | | |
